# Supplementary material for: Influence of Starch on the Structure–Properties Relationship in Polyethylene Glycol/Polycaprolactone Diol Polyurethanes
Source: MDPI journal article supplement (doi:10.3390/polym14153184), 2022-08-04
Supplement: s1 [file s1]

## Supplementary material

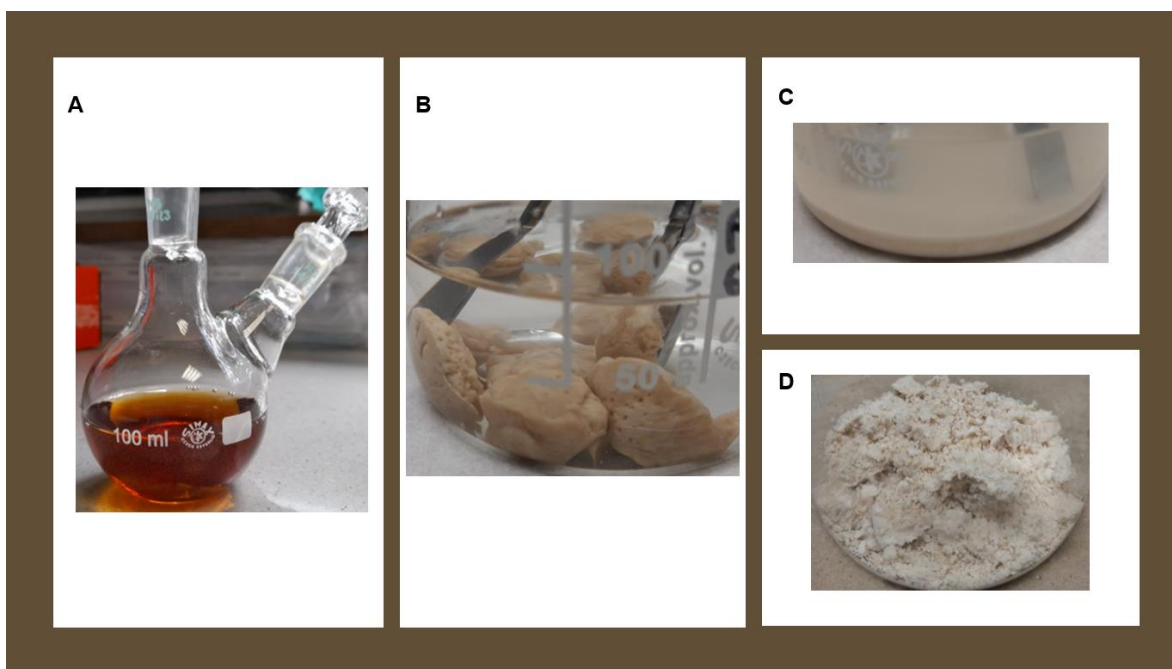

**Figure S1.** Synthesis of zwitterionic starch after (A) twelve-hour of reaction, (B) neutralization, precipitation, and three wash with methanol, (C) smash in methanol, and (D) filtration.

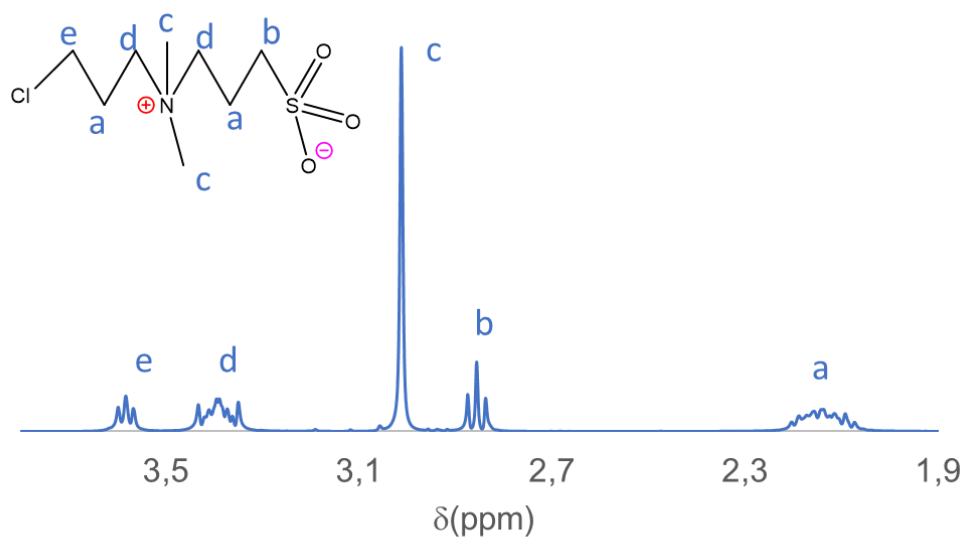

**Figure S2.**  $^1\text{H}$  RMN spectrum of DCAPS

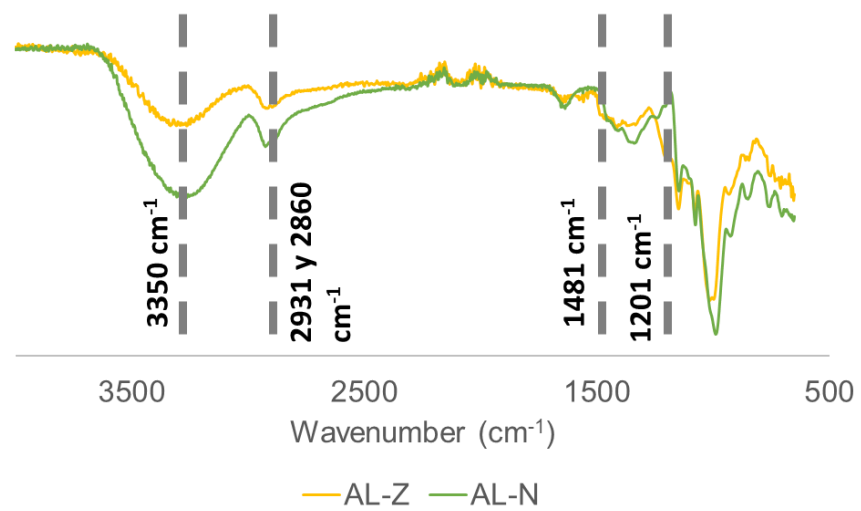

**Figure S3.** FTIR spectra of AL-N and AL-Z

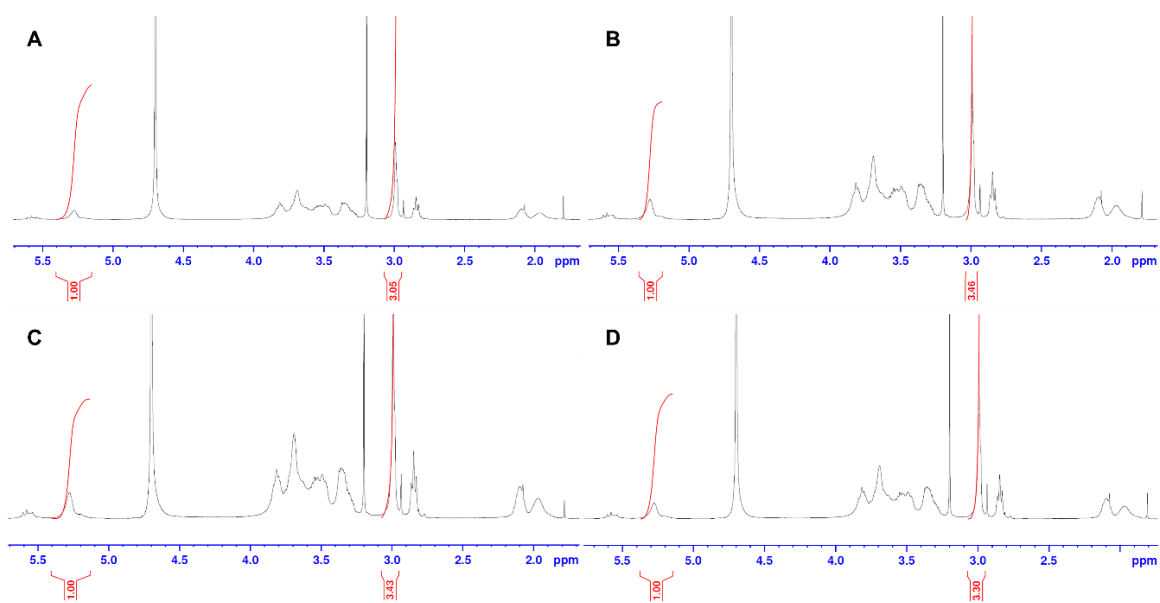

**Figure S4.** AL-Z synthesis replicate (A) 1, (B) 2, (C) 3, and (D) 4

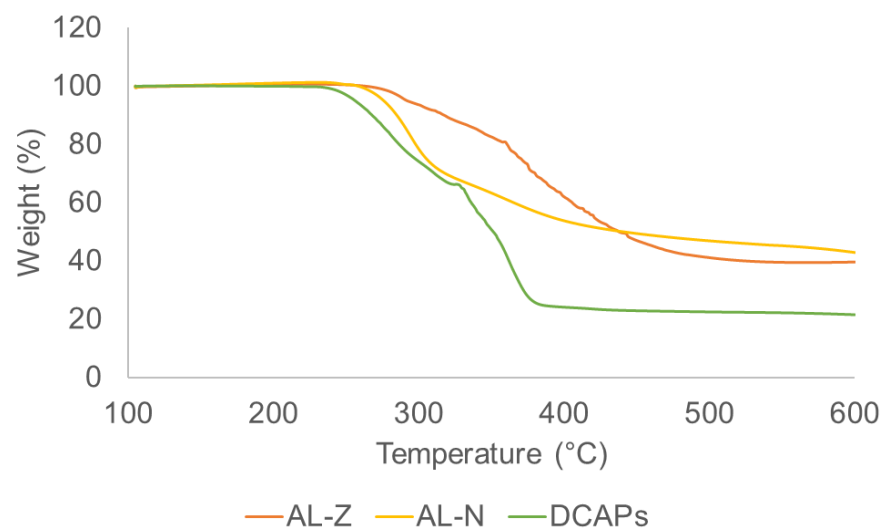

Figure S5. TGA of AL-N, AL-Z and DCPAS

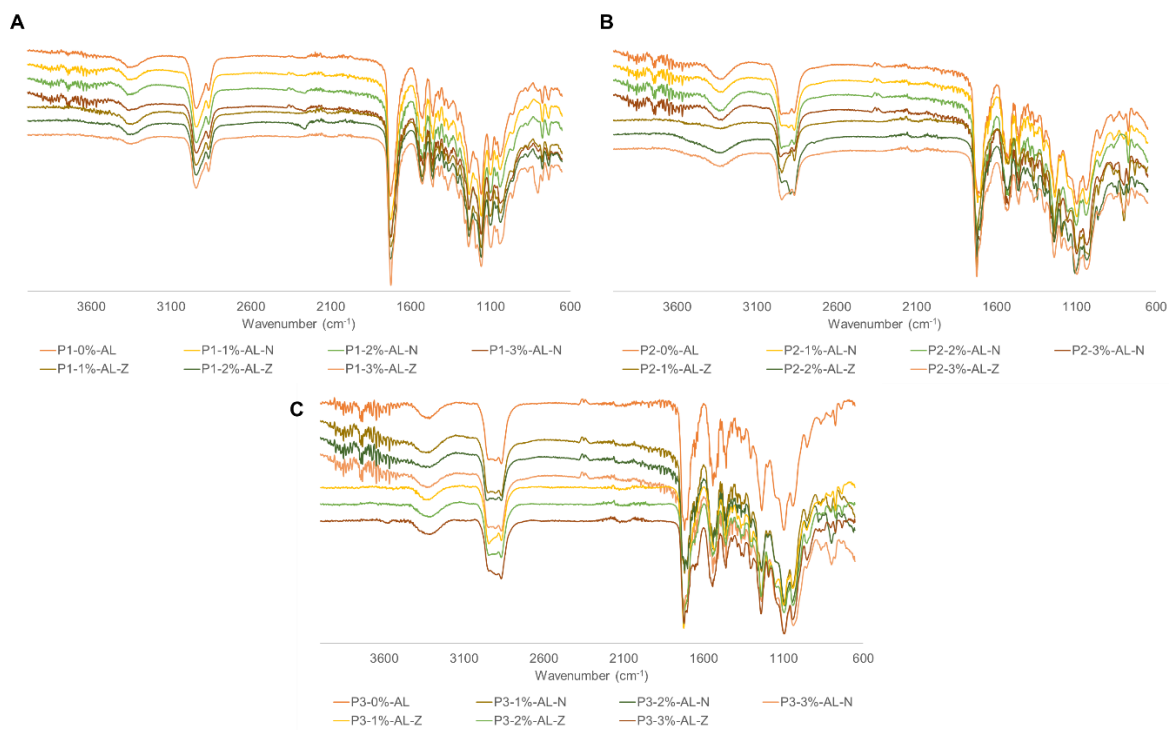

Figure S6. FTIR spectra of (A) P1, (B) P2, and (C) P3 of polyurethane composites

**Table S 1.** Element weight composition of polyurethane composites from energy dispersive X-ray spectroscopy analysis.

| PU | Starch | Concentration | Zone   | Element Wt% |       |      |
|----|--------|---------------|--------|-------------|-------|------|
|    |        |               |        | C           | O     | S    |
| P1 | AL-N   | 3%            | AL-N   | 71.05       | 28.95 | 0    |
|    |        |               | AL-Z   | 66.01       | 28.52 | 4.02 |
|    |        |               | AL-0%  | 87.95       | 12.05 | 0    |
|    |        |               | Matrix | 85.61       | 14.39 | 0    |
|    |        |               | Filler | 80.37       | 19.63 | 0    |
|    |        |               | Matrix | 85.73       | 12.56 | 0    |
|    |        |               | Filler | 79.11       | 19.22 | 1.20 |
|    |        |               |        |             |       |      |

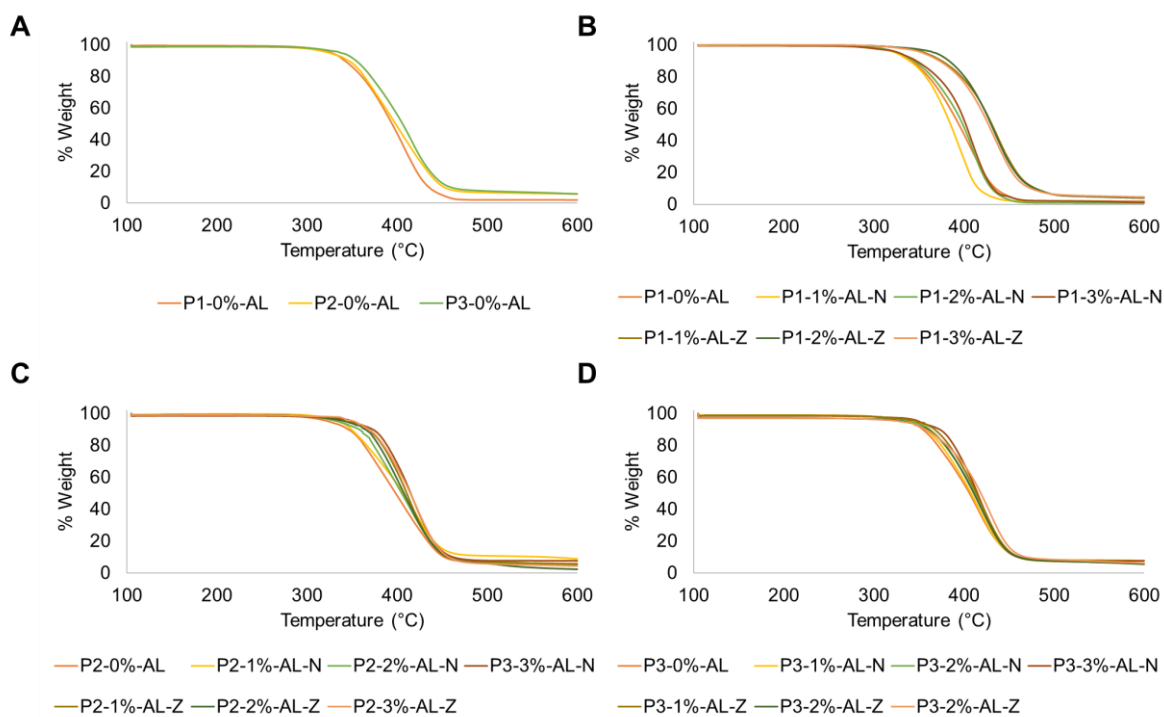

**Figure S7.** TGA of polyurethane (A) without fillers, (B) P1, (C) P2, and (D) P3 composites

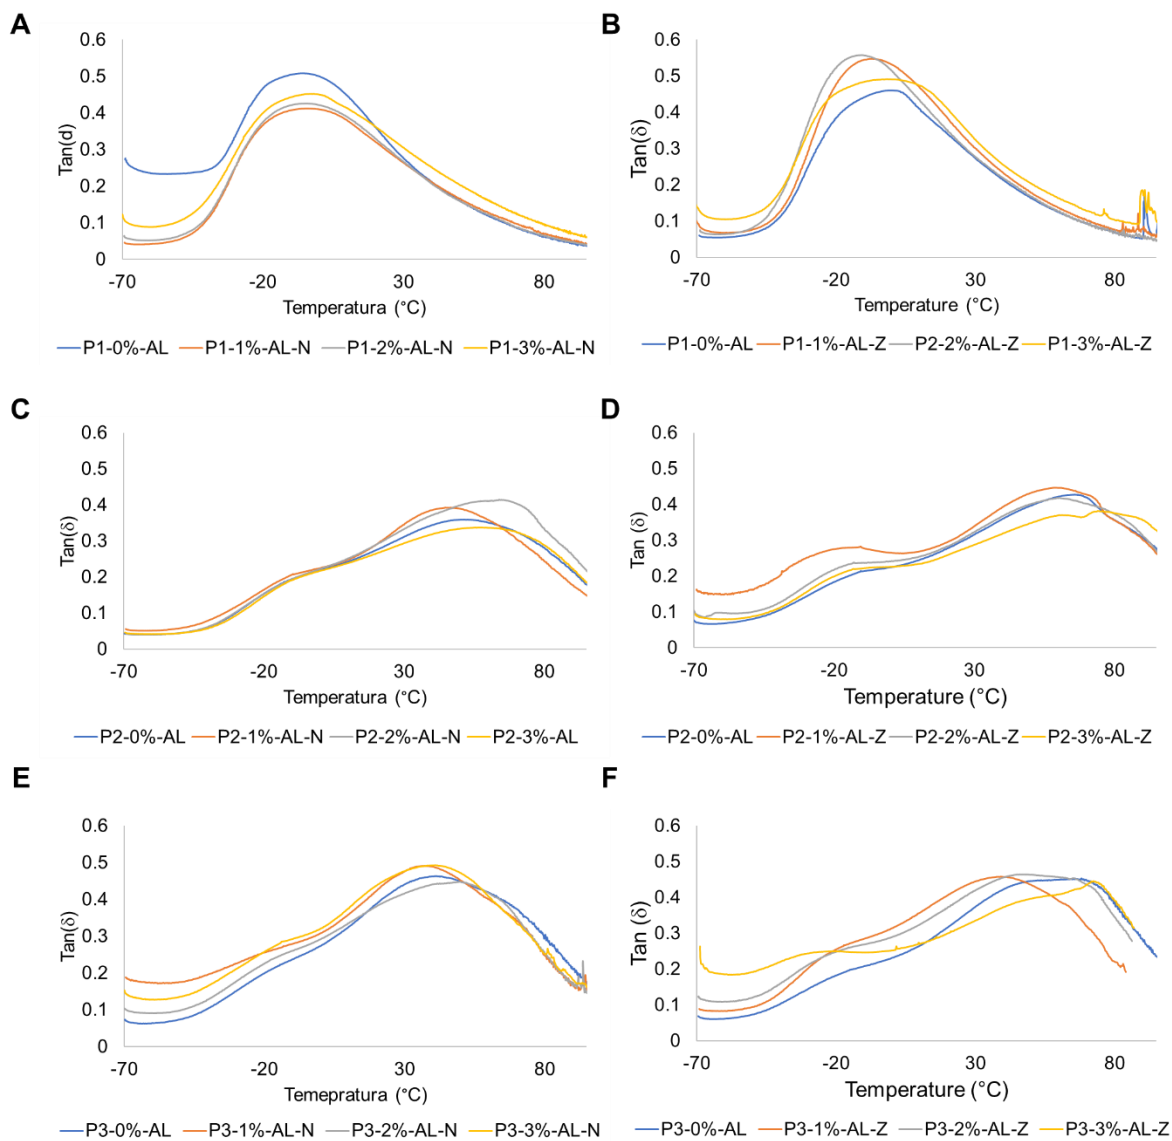

**Figure S8.** Loss factor of polyurethane composites P1 (A-B), P2 (C-D), and P3 (E-F)

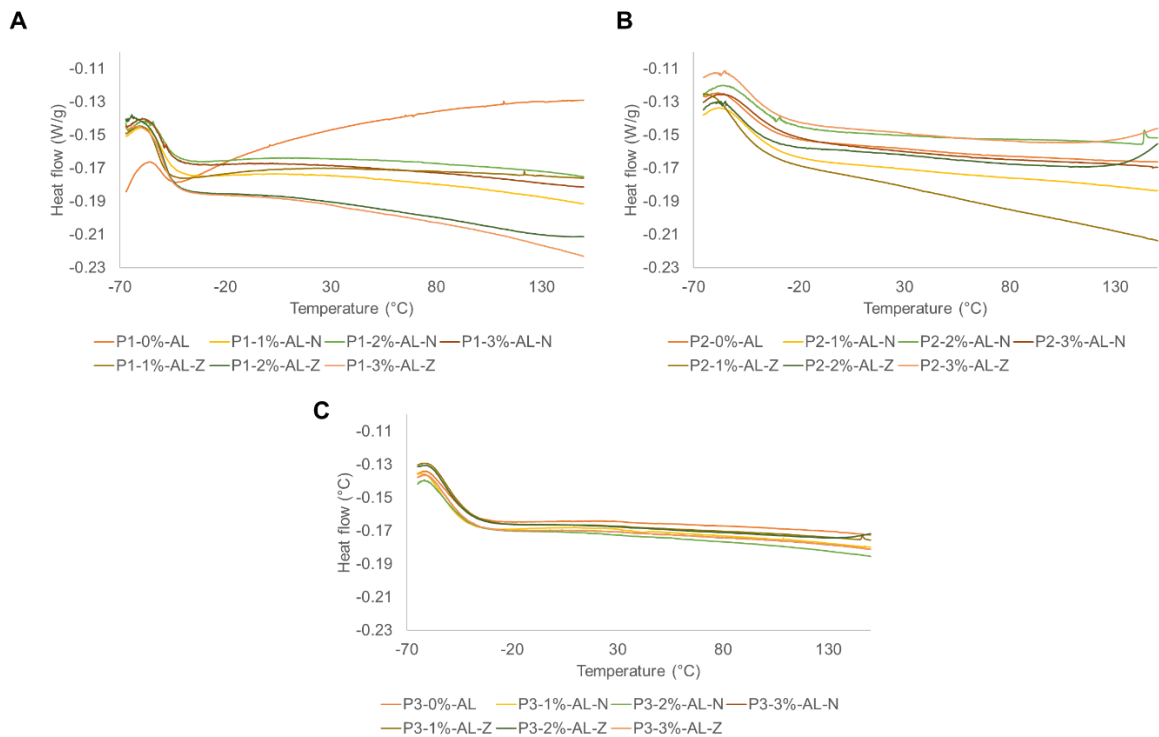

**Figure S9.** DSC of polyurethane (A) P1, (B) P2, and (C) P3 composites

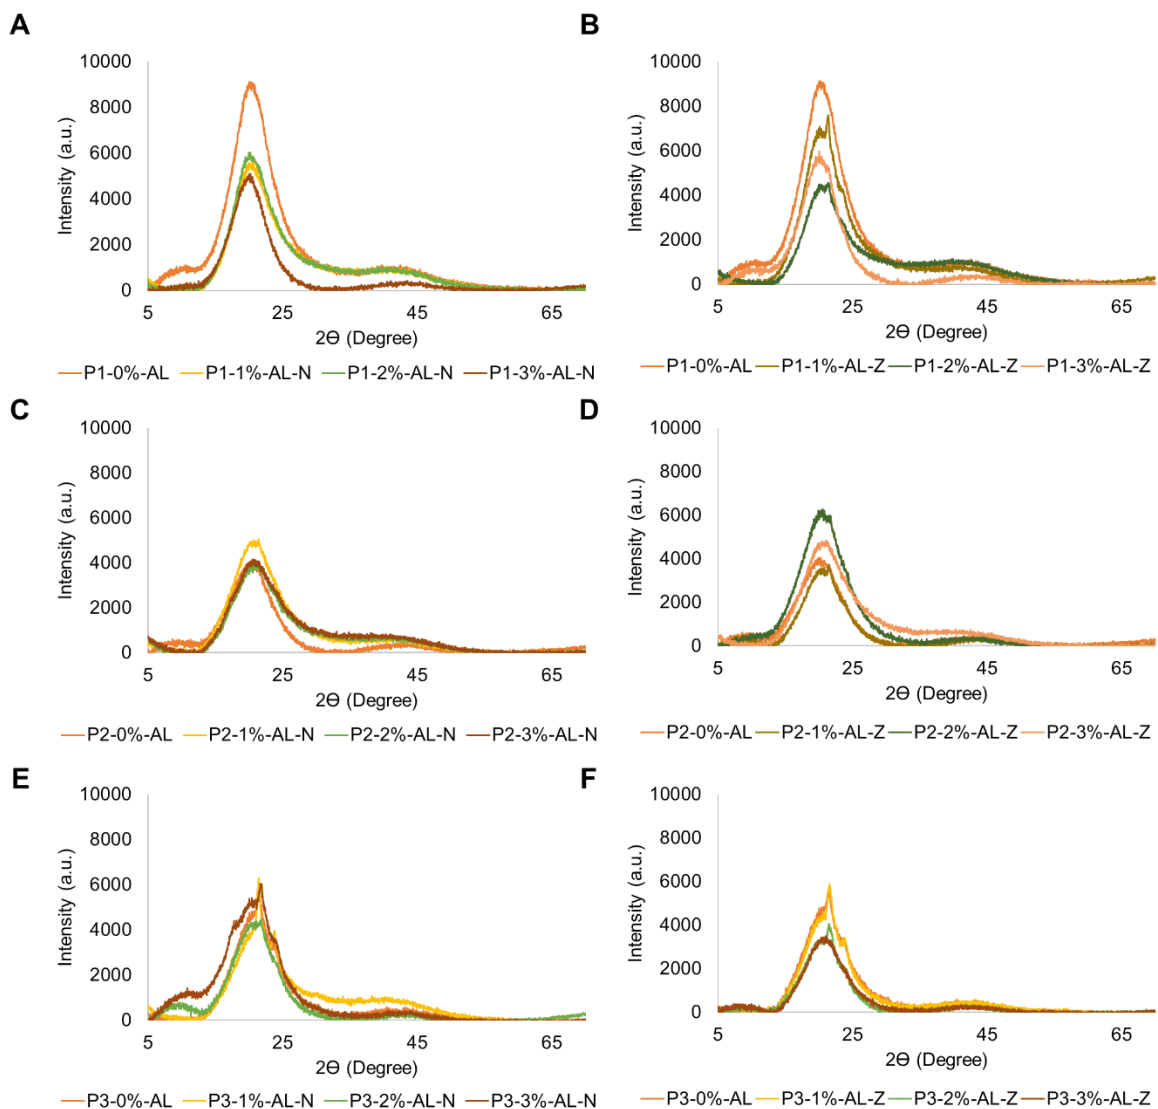

**Figure S10.** XRD spectra of composite polyurethane P1 (A-B), P2 (C-D), and P3 (E-F)
